# Supplementary material
Source: HighWire-hosted journal article supplement (https://cancerres.aacrjournals.org/content/suppl/2017/12/06/0008-5472.CAN-17-1357)
Supplement: 182965_3_supp_4394775_7zh9b8.docx [file 182965_3_supp_4394775_7zh9b8.docx]

**Figure S8: *SERPINE2* expression is stable following knockdown of endogenous *APC* or induction of exogenous *APC* at three time points examined.**


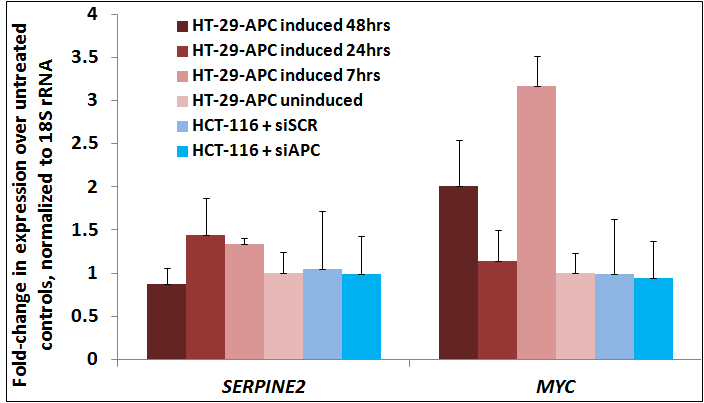


Total RNA was isolated from HCT-116 and HT-29-APC cells in the presence or absence of treatments modulating *APC* status. HT-29-APC cells harbor biallelic endogenous *APC* mutations and were induced to express wild-type *APC* exogenously with a metallothionein promoter induced by treatment with 100 μM zinc chloride for 7, 24 or 48 hrs. HCT-116 cells were transfected with either non-targeting scrambled control *siRNA* (siSCR) or *siRNA* targeting *APC* (siAPC), as the cell line is *APC* wild-type but exhibits constitutively activated canonical WNT signaling due to a *CTNNB1* mutation rendering β-catenin resistant to degradation. cDNA was reverse transcribed from each sample and expression of *SERPINE2* and *MYC* was examined by qPCR using 10 or 20 ng of cDNA per reaction. Expression of both *SERPINE2* and *MYC* (positive control) was expected to increase following *APC* silencing and decrease following *APC* induction. *MYC* proved to be an insensitive positive control in this case, consistent with previous evidence from the HCT-116 cell line suggesting minimal responsiveness to *APC* silencing, and APC induction in the HT-29-APC cell line increased rather than decreased its expression. *SERPINE2* similarly was unresponsive to *APC* modulation in either cell line at the time points examined.
